# Supplementary figures and images for: Local Phenomena Shape Backyard Soil Metabolite Composition
Source: MDPI journal article supplement (doi:10.3390/metabo10030086), 2020-02-29

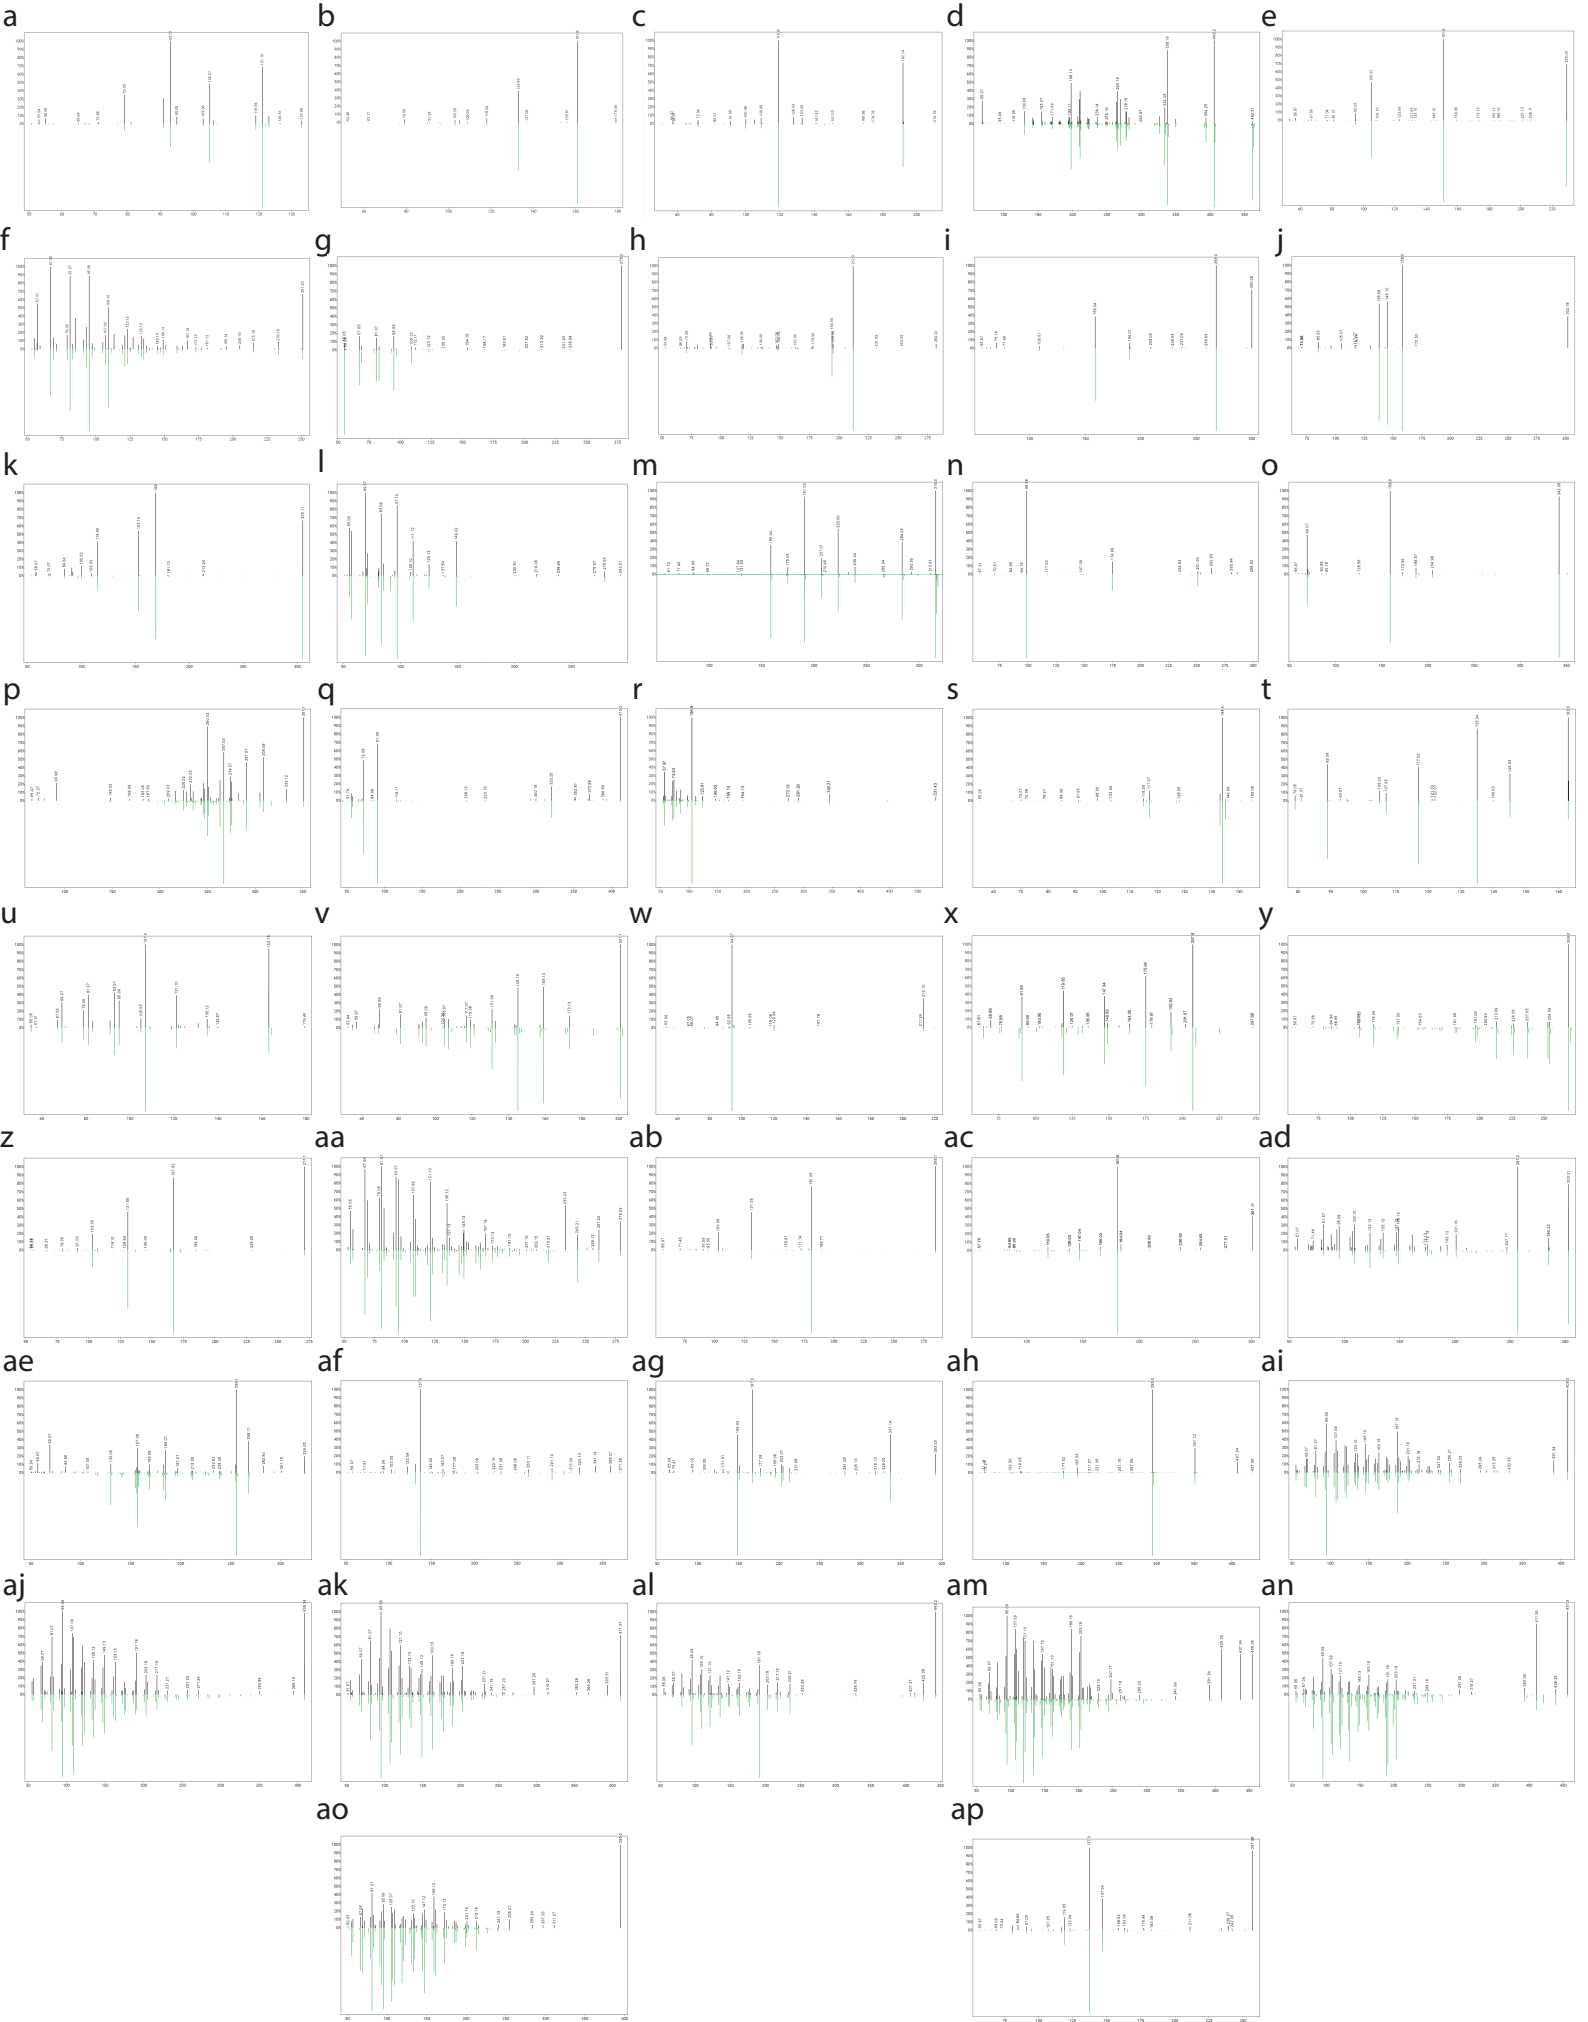

Supplement: s1 [file s1]
